# Supplementary material for: Association of day-of-injury plasma glial fibrillary acidic protein concentration and six-month posttraumatic stress disorder in patients with mild traumatic brain injury
Source: PubMed Central journal article supplement (PMC9630517; doi:10.1038/s41386-022-01359-5), 2022-06-18
Supplement: 41386_2022_1359_MOESM1_ESM.pdf [file 41386_2022_1359_MOESM1_ESM.pdf]

**Supplemental Figure 1: STROBE DIAGRAM**

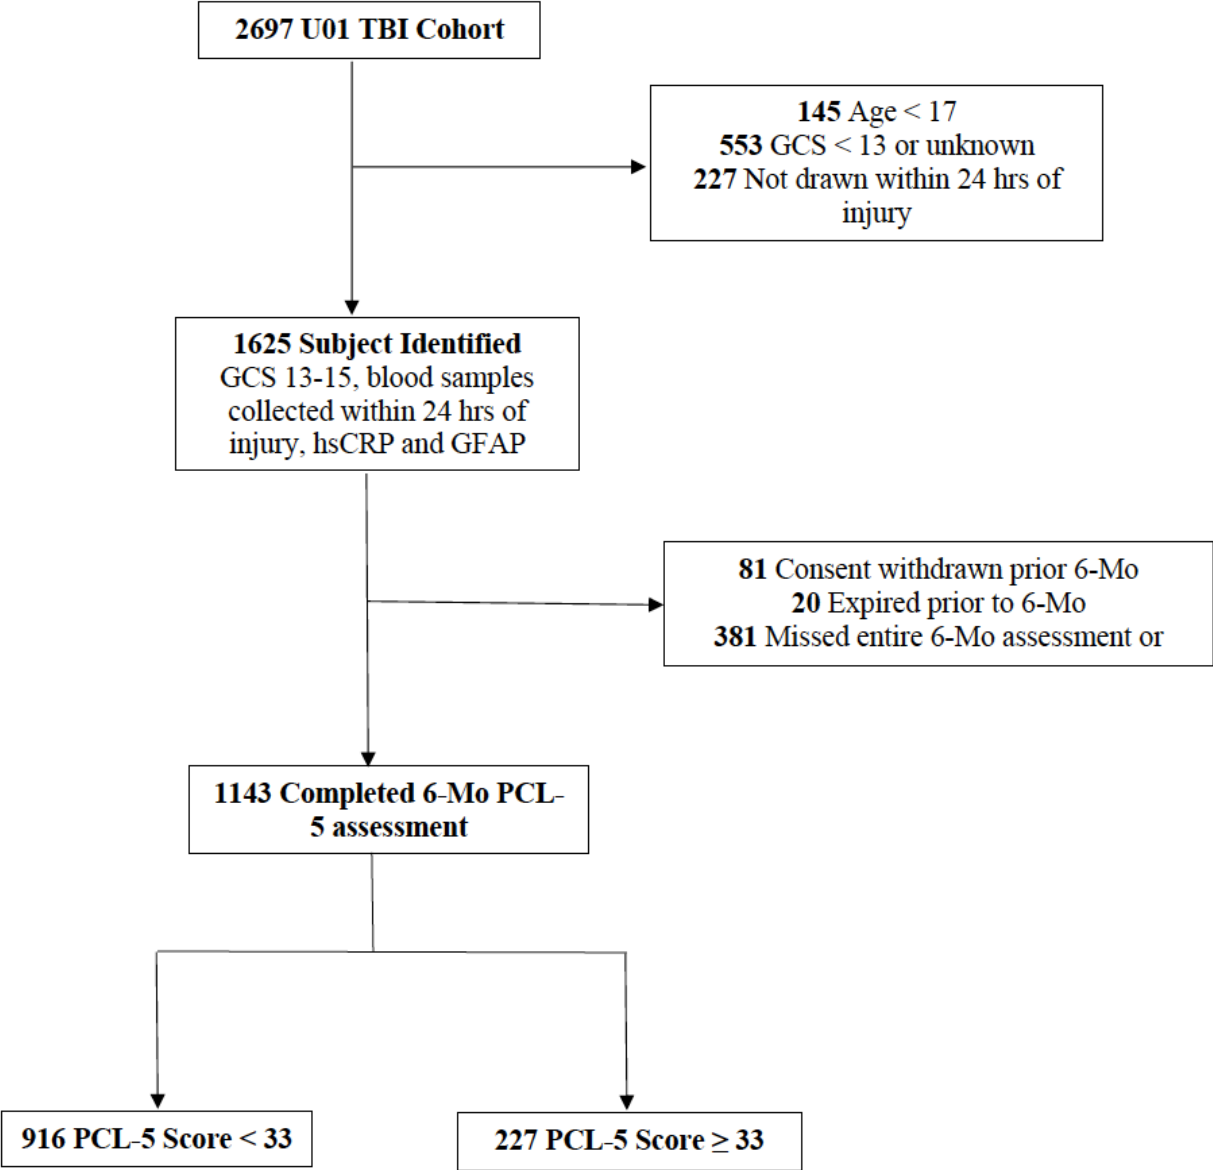

## Supplemental Figure 2: Histogram of PCL-5 Total at 6m post-injury

Histogram of PCL-5 Total at 6m post-Injury

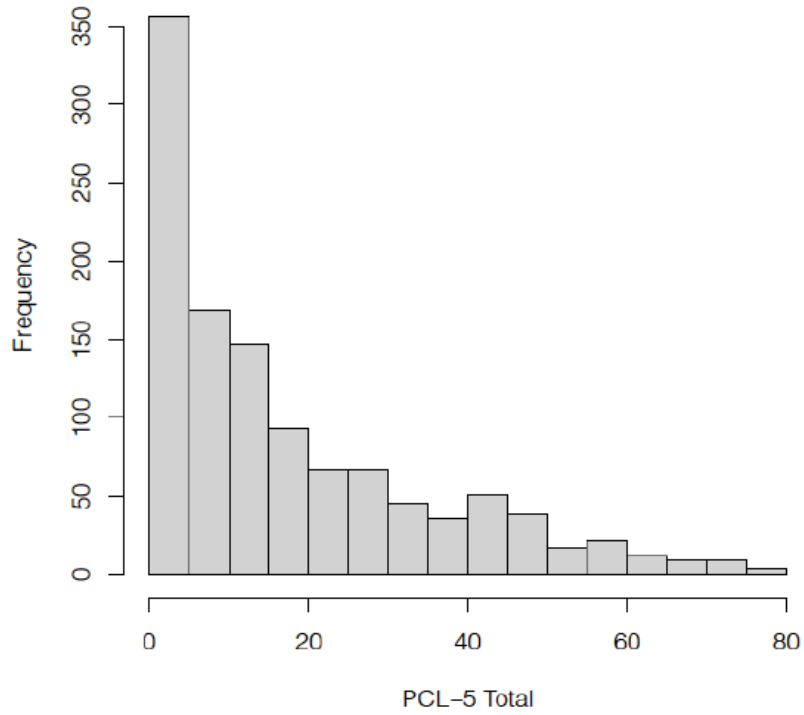

**Supplemental Table: Sensitivity Model excluding subjects with posttraumatic amnesia > 24 hours (n=44 excluded; n=1099 included)**

|                     | OR    | OR.l  | OR.u  | p.value |
|---------------------|-------|-------|-------|---------|
| Age                 | 0.995 | 0.985 | 1.005 | 0.285   |
| Sex_Female          | 1.341 | 0.952 | 1.89  | 0.094   |
| Race_Black          | 2.904 | 1.982 | 4.255 | <0.001  |
| InjCause_Violence   | 2.531 | 1.394 | 4.594 | 0.002   |
| Psychiatric History | 2.573 | 1.805 | 3.67  | <0.001  |
| PriorTBI_yes        | 1.629 | 1.162 | 2.284 | 0.005   |
| CT_abnormal         | 0.848 | 0.554 | 1.298 | 0.447   |
| SamplingTime9-16h   | 1.38  | 0.841 | 2.265 | 0.203   |
| SamplingTime17-24h  | 1.856 | 1.129 | 3.051 | 0.015   |
| logGFAP             | 0.861 | 0.774 | 0.959 | 0.007   |
| loghsCRP            | 1.091 | 0.962 | 1.237 | 0.175   |
